# Supplementary material
Source: MDPI journal article supplement (https://www.mdpi.com/2076-3417/7/8/855)
Supplement: s1 [file s1]

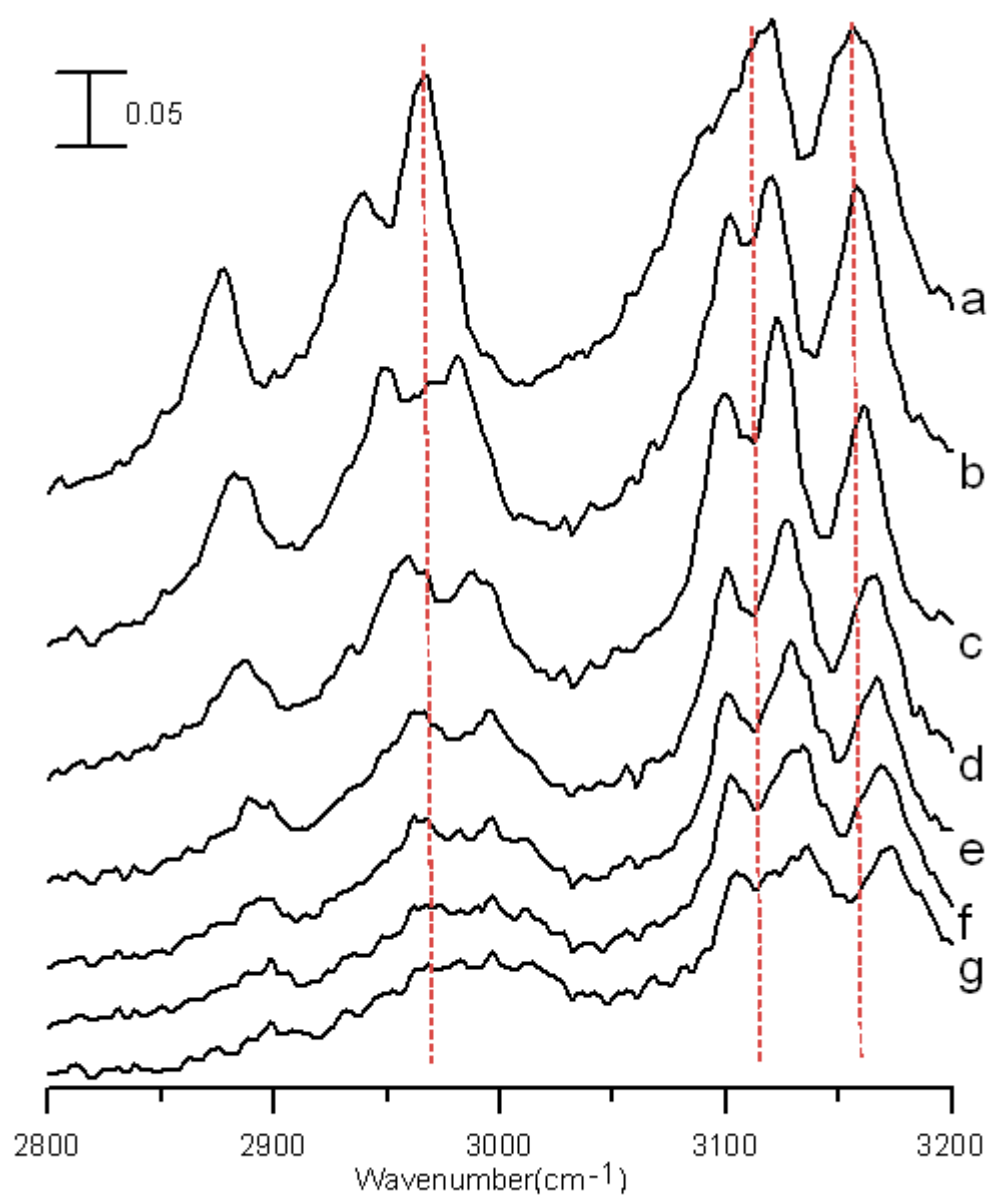

**Figure S1.** IR spectra of the mixture after 2 washes with ethanol obtained under ambient pressure (curve a) and at 0.4 (curve b), 0.7 (curve c), 1.1 (curve d), 1.5 (curve e), 1.8 (curve f), and 2.5 GPa (curve g).

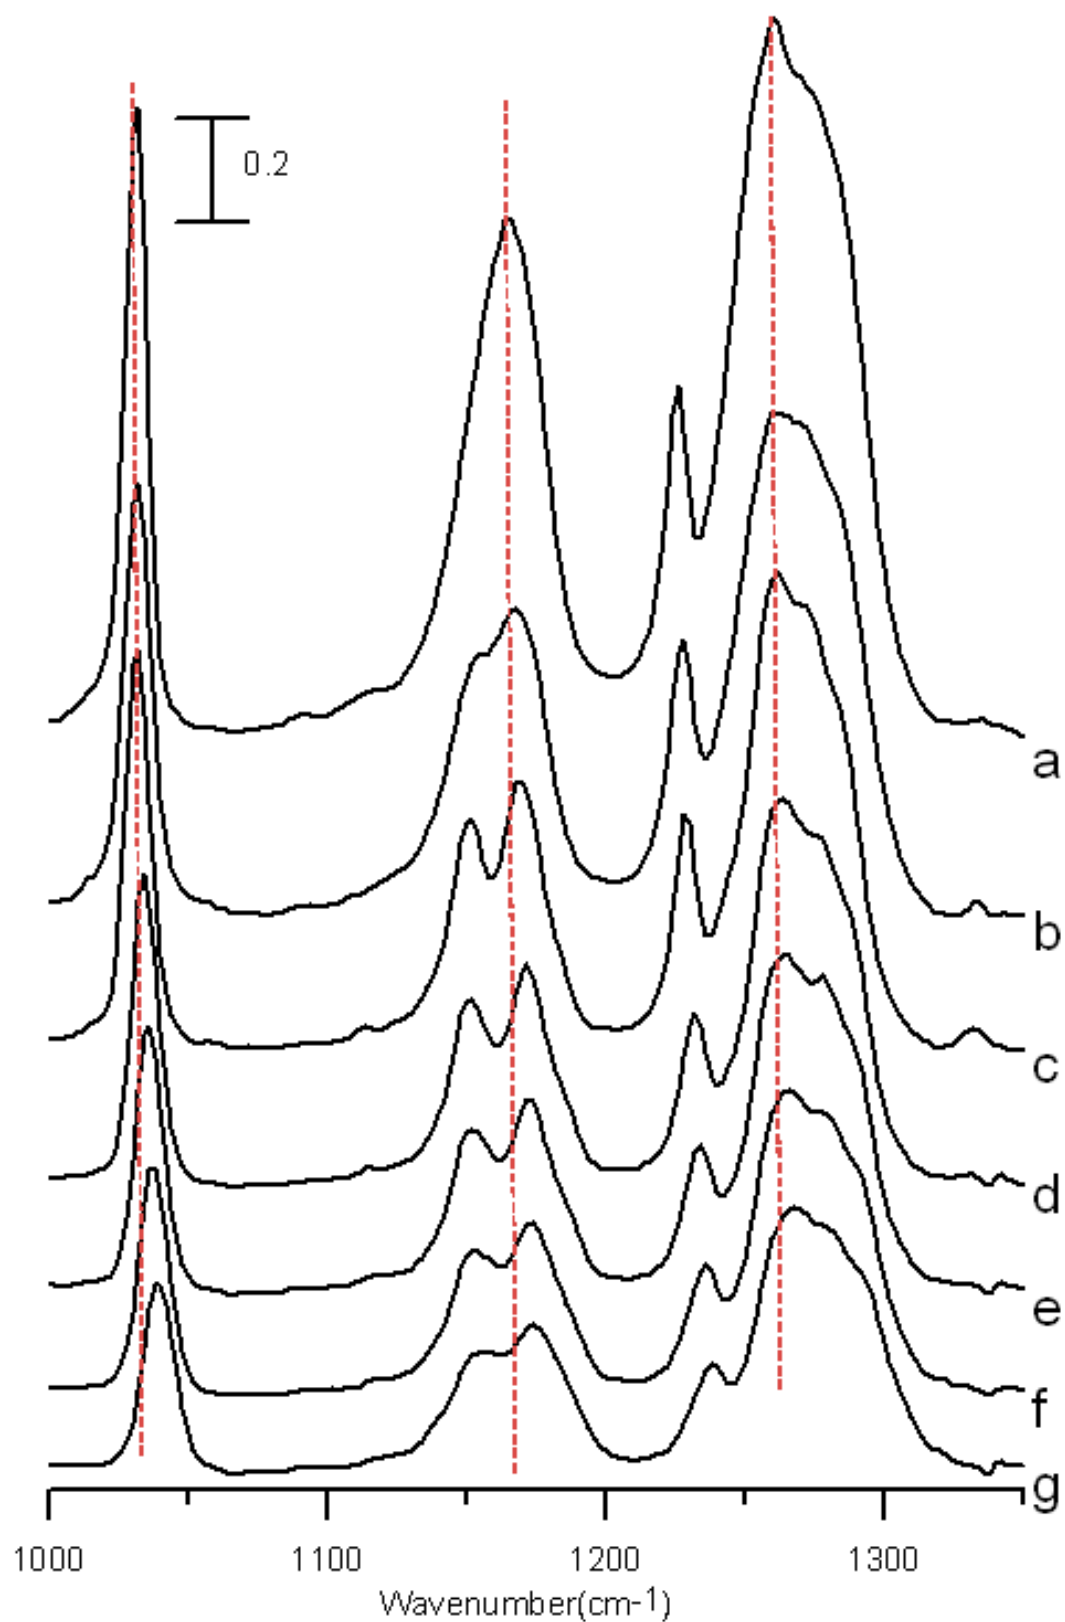

**Figure S2.** Infrared spectra of the mixture after 2 washes with ethanol obtained under ambient pressure (curve a) and at 0.4 (curve b), 0.7 (curve c), 1.1 (curve d), 1.5 (curve e), 1.8 (curve f), and 2.5 GPa (curve g).

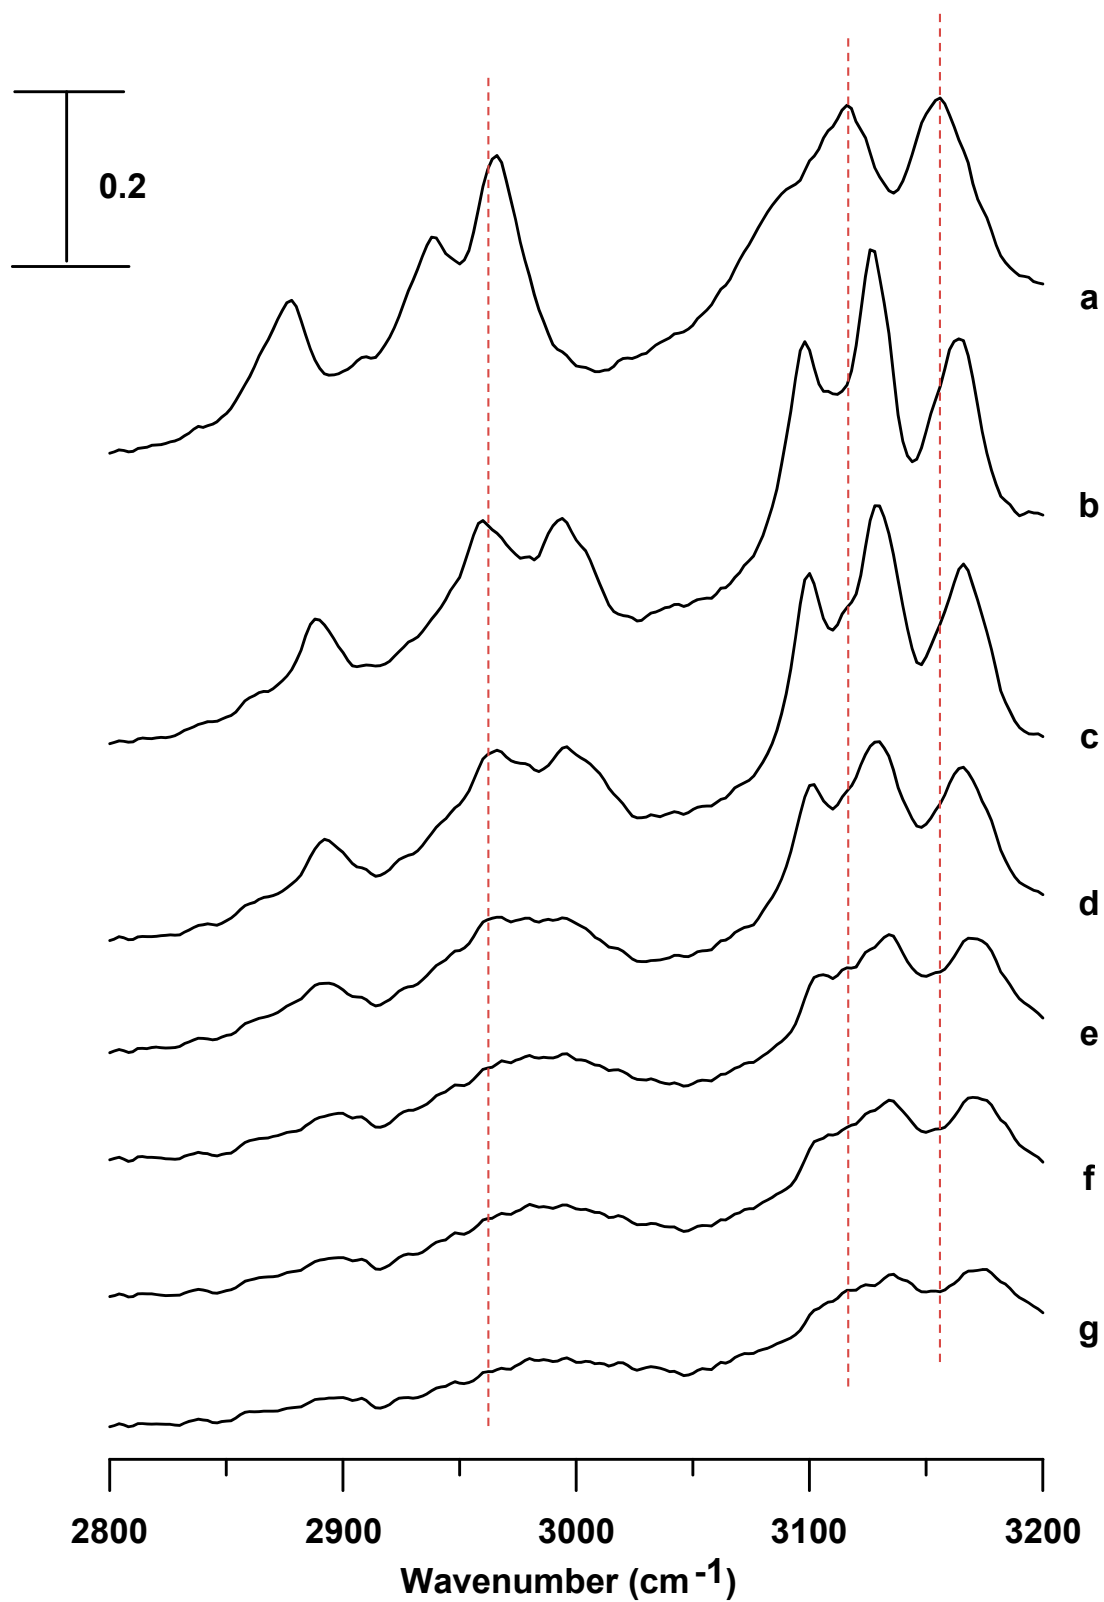

**Figure S3.** Infrared spectra of pure [BMIM][TFS] (99% , Lot: N00364.7, UniRegion) obtained under ambient pressure (curve a) and at 0.4 (curve b), 0.7 (curve c), 1.1 (curve d), 1.5 (curve e), 1.8 (curve f), and 2.3 GPa (curve g).
